# Supplementary material for: A theoretical investigation on the photochemical performance of hybrid dye-sensitized solar cells based on Keggin-type polyoxometalates
Source: Royal Society of Chemistry journal article supplement (doi:10.1039/d5ra06975k), 2025-01-01
Supplement: d5ra06975k1.pdf [file d5ra06975k1.pdf]

# A theoretical investigation on the photochemical performance of hybrid dye-sensitized solar cells based on Keggin-type polyoxometalates

Maryam Fallah, Bahram Yadollahi\*, and Reza Omidyan

Department of Chemistry, University of Isfahan, Isfahan 81746-73441, Iran.

## Supporting Information

| Table of contents      |                                                      | Page No. |
|------------------------|------------------------------------------------------|----------|
| Theoretical background | Electron excitation analysis of dyes                 | S1-S4    |
| Table S1               | Comparison of optimized geometry                     | S5       |
| Figure S1              | The optimized molecular structure of DTP and DTP/POM | S5       |
| Figure S2              | Molecular orbitals                                   | S6       |
| Table S2               | Electronic transition states                         | S7       |
| Figure S3              | Natural transition orbitals                          | S8       |
| Table S3               | C <sub>hole</sub> & C <sub>ele</sub> map             | S9       |
| Figure S4              | Heat maps                                            | S10      |
| Figure S5              | The percentage of each fragment                      | S11      |
| Figure S6              | Absorption spectra                                   | S12      |
| References             |                                                      | S12      |

### 1.1 Theoretical background of electron excitation analysis of dyes

To assess the ICT capabilities of dyes, various ICT parameters were calculated, including the quantity of transferred charges ( $q_{CT}$ ), the effective charge transfer distance ( $d_{CT}$ ), and the  $t$  index, which evaluates the separation degree between  $\rho^+$  (r) and  $\rho^-$  (r) based on the total densities of both ground and excited states. The charge transfer (CT) length in X/Y/Z can be measured by distance between centroid of hole and electron in corresponding directions:

$$D_x = |X_{ele} - X_{hole}| \quad D_y = |Y_{ele} - Y_{hole}| \quad D_z = |Z_{ele} - Z_{hole}|$$

The total magnitude of CT length is referred to as  $D$  index:

$$(1) \quad D \text{ index} = |D| \equiv \sqrt{(D_x)^2 + (D_y)^2 + (D_z)^2}$$

$t$  index is designed to measure separation degree of hole and electron in CT direction:

$$(2) \quad t \text{ index} = D \text{ index} - H_{CT}$$

$H\lambda$  measures average degree of spatial extension of hole and electron distribution in X/Y/Z direction,  $H_{CT}$  is that in CT direction.  $\Delta r$  index has been established to enhance the investigation

of excited electronic states within the context of Time-Dependent Density Functional Theory, that is derived from the charge centroids of the orbitals participating in the excitations and can be understood in terms of the distance between the hole and the electron. The  $\Delta r$  can be articulated as follows:

$$(3) \quad \Delta r = \sum_{i,a} \Delta r_i^a$$

The term  $\Delta r_i^a$  represents the contribution of the orbital transition from state  $i$  to state  $a$  in relation to the  $\Delta r$  index:

$$(4) \quad \Delta r_i^a = \frac{(k_i^a)^2}{\sum_{i,a} (k_i^a)^2} |\langle \varphi_a | r | \varphi_a \rangle - \langle \varphi_i | r | \varphi_i \rangle|$$

The index  $i$  and  $a$  run over all occupied and virtual MOs, respectively.  $\varphi$  is orbital wave function. It is important to note that when an electron excitation can be accurately depicted by a one pair of molecular orbital transitions, the  $r$  index and  $D$  index established within the framework of hole-electron analysis will, in principle, be completely equivalent.

$$(5) \quad \Delta r = |\langle \varphi_a | r | \varphi_a \rangle - \langle \varphi_i | r | \varphi_i \rangle| \equiv \left| \int r |\varphi_a(r)|^2 dr - \int r |\varphi_i(r)|^2 dr \right|$$

$$(6) \quad D \text{ index} = |D| = \left| \int r \rho^{ele}(r) dr - \int r \rho^{hole}(r) dr \right| = \left| \int r |\varphi_a(r)|^2 dr - \int r |\varphi_i(r)|^2 dr \right|$$

To characterize overlapping extent of hole and electron,  $S_r$  index is defined as follows:

$$(7) \quad S_r \text{ index} = \int S_r(\mathbf{r}) d\mathbf{r} \equiv \int \sqrt{\rho^{hole}(r) \rho^{ele}(r)} dr$$

The distributions of holes and electrons frequently exhibit numerous nodes or intricate fluctuations. To facilitate a visual analysis of these distributions, the  $C_{hole}$  and  $C_{ele}$  functions have been introduced. The characteristics of the  $C_{hole}$  and  $C_{ele}$  functions resemble those of the Gaussian function; they are exceptionally smooth and their values asymptotically approach zero as one moves away from the centroid of the hole or electron distribution.<sup>1</sup>

$$(8) \quad C_{ele}(\mathbf{r}) = A_{ele} \exp \left[ -\frac{(x - X_{ele})^2}{2\sigma_{ele,x}^2} - \frac{(y - Y_{ele})^2}{2\sigma_{ele,y}^2} - \frac{(z - Z_{ele})^2}{2\sigma_{ele,z}^2} \right]$$

$$(9) \quad C_{hole}(\mathbf{r}) = A_{hole} \exp \left[ -\frac{(x - X_{hole})^2}{2\sigma_{hole,x}^2} - \frac{(y - Y_{hole})^2}{2\sigma_{hole,y}^2} - \frac{(z - Z_{hole})^2}{2\sigma_{hole,z}^2} \right]$$

Coulomb attractive negative value is known as exciton binding energy, which is a positive value. This term can be calculated via simple Coulomb formula:

$$(10) \quad E_C = \iint \frac{\rho^{hole}(r_1)\rho^{ele}(r_2)}{|r_1 - r_2|} dr_1 dr_2$$

## 1.2. Theoretical background of efficiency of dye-sensitized solar cells

The power conversion efficiency (*PCE*) in dye-sensitized solar cells (DSSCs) can be articulated as follow:<sup>2</sup>

$$(11) \quad PCE = \frac{J_{sc} \times V_{oc} \times FF}{P_{in}} \times 100\%$$

In this context,  $J_{SC}$  represents the short-circuit photocurrent density,  $V_{OC}$  denotes the open-circuit photovoltage,  $P_{in}$  indicates the intensity of the incident light, and  $FF$  refers to the fill factor of the photovoltaic cell. Enhancing  $J_{SC}$  and  $V_{OC}$  represents a viable strategy for increasing *PCE*.  $J_{sc}$  is a crucial parameter expressed in the following manner:<sup>3</sup>

$$(12) \quad J_{sc} = \int LHE_{(\lambda)} \phi_{inject} \eta_{collect} d\lambda$$

Light harvesting efficiency (*LHE*), electron injection efficiency ( $\phi_{inject}$ ), and charge collection efficiency ( $\eta_{collect}$ ) are interconnected factors that play a crucial role in the overall performance of the system. In the case of dye-sensitized solar cells (DSSCs), the electrode remains consistent; the only difference is the various sensitizers. Therefore,  $\eta_{collect}$  can be regarded as a constant. While the LHE is governed by the oscillator strength ( $f$ ) that corresponds to the maximum absorption wavelength ( $\lambda_{max}$ ). This relationship can be expressed as follows:<sup>4</sup>

$$(13) \quad LHE = 1 - 10^{-f}$$

The efficiency of electron injection ( $\phi_{inject}$ ), is directly related to the free enthalpy ( $\Delta G_{inj}$ ), which corresponds to the transfer of electrons from the excited states of dyes to the conduction band (CB) of  $TiO_2$ .  $\Delta G$  parameter establishes the rate of electron injection and can be regarded as the driving force for electron injection. The following equations can be used to describe it:<sup>5</sup>

$$(14) \quad \Delta G_{inj} = E_{OX}^{dye*} - E_{CB}^{TiO_2}$$

$$(15) \quad E_{OX}^{dye*} = E_{OX}^{dye} - \Delta E$$

$E_{OX}^{dye*}$  represents the excited state oxidation potential, while  $E_{OX}^{dye}$  represents the ground state oxidation potential. According to the Koopman theorem,<sup>6</sup> the negative  $E_{HOMO}^{dye}$  is assessed as the oxidation potential corresponding to the ground state ( $E_{OX}^{dye}$ ).

The  $E_{CB}^{TiO_2}$  indicates the conduction band edge of  $TiO_2$ . Accurately determining this value poses challenges due to its significant sensitivity to operating conditions, particularly the pH of the solution. In the current investigation, we have employed a value of -4.0 eV which aligns with the experimental conditions, where the semiconductor interfaces with aqueous redox electrolytes

maintained at a constant pH of 7.0.<sup>7</sup>  $\Delta E$  denotes the vertical excitation energy. Lower  $\Delta G_{inj}$  and higher  $LHE$  result in light harvesting efficiency higher  $J_{sc}$ .<sup>8</sup> The regeneration process, denoted as  $\phi_{regen}$ , can be scaled in proportion to the Gibbs free energy of regeneration ( $\Delta G_{regen}$ ) associated with the oxidized dye and the iodine/iodide electrolyte. The Gibbs free energy of regeneration can be analyzed using Equation (16).<sup>9</sup>

$$(16) \quad \Delta G_{regen} = E_{redox} - E_{dye}$$

$$(17) \quad \Delta G_{cr} = E_{CB}^{TiO_2} - E_{dye}$$

The open-circuit voltage,  $V_{oc}$ , as presented in equation (11), pertains to the transfer of electrons from the excited dye to the conduction band of the semiconductor. This relationship is defined by the subsequent equation.

$$(18) \quad V_{oc} = E_{LUMO} - E_{CB}^{TiO_2}$$

**Table S1.** Comparison of optimized geometry (bond lengths) at B3LYP and PBE methods and X-ray distances (in Å) for  $[\text{PW}_{12}\text{O}_{40}]^{3-}$

| Selected bond         | B3LYP/6-31G(d)/LANL2DZ | PBE/6-31G(d)/LANL2DZ | Exp. <sup>a</sup> |
|-----------------------|------------------------|----------------------|-------------------|
| X- O <sub>tetra</sub> | 1.55                   | 1.57                 | 1.53              |
| W- O <sub>tetra</sub> | 2.45                   | 2.45                 | 2.43              |
| X-W                   | 3.59                   | 3.60                 | 3.49              |
| W-O <sub>ter</sub>    | 1.71                   | 1.73                 | 1.69              |
| W-O <sub>brid</sub>   | 1.92                   | 1.93                 | 1.93              |

<sup>a</sup>The experimental values were adapted from ref.10

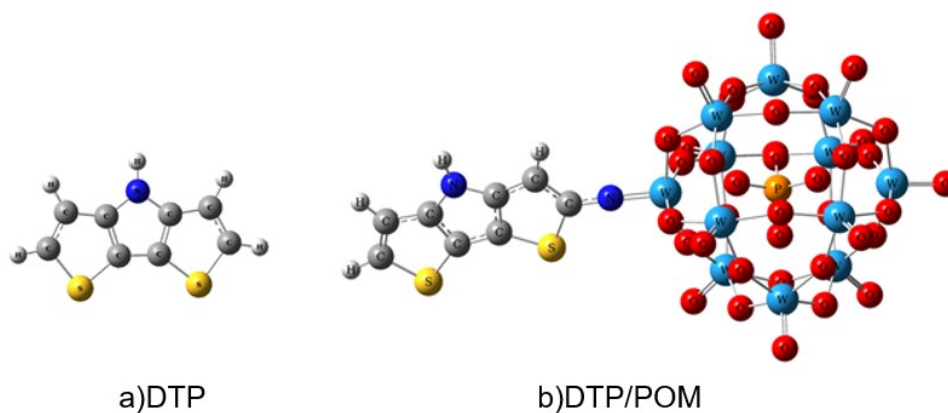

**Figure S1.** The optimized molecular structure of DTP and DTP/POM at B3LYP/6-31G(d)/LANL2DZ method

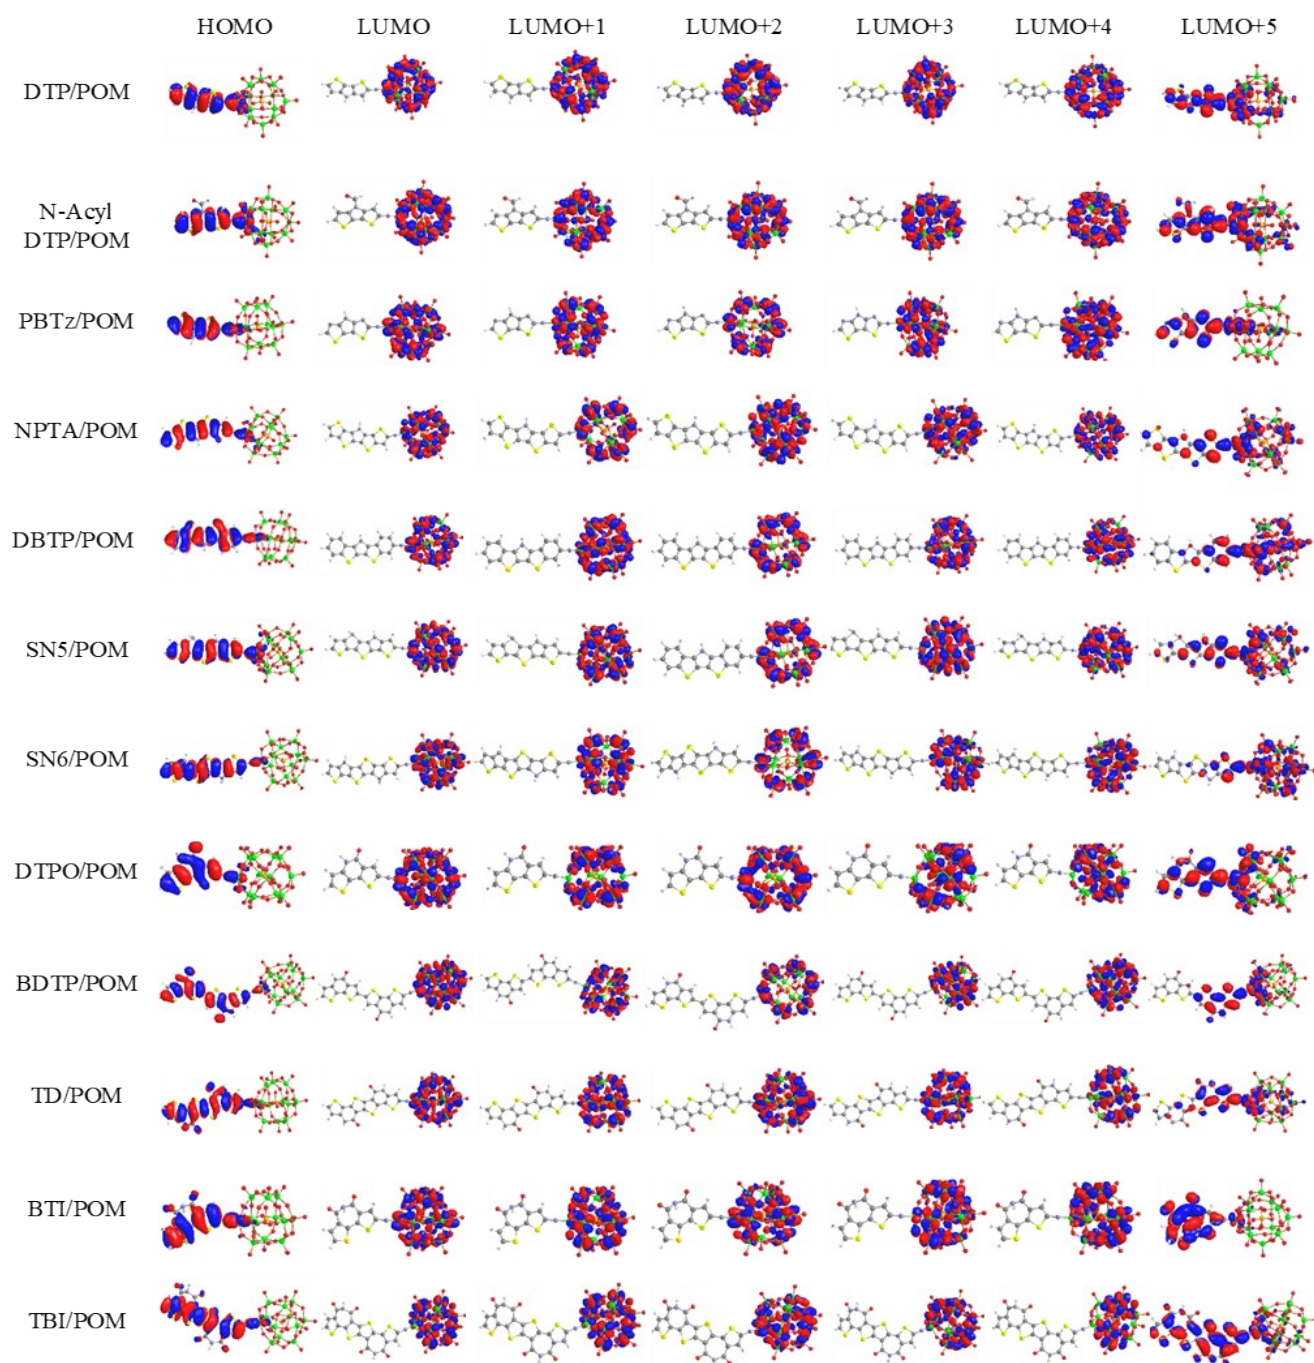

**Figure S2.** Molecular orbitals (MOs) for the studied designed hybrids

**Table S2.** Some electronic transition states, main transitions, and their contribution percentages, energy vertical,  $\lambda$ , and oscillator strengths of the studied designed hybrids (The electron transitions in the visible region with the highest oscillator strengths are bolded).

| Dye               | State | Transition                                                        | Contribution%         | Energy (eV) | $\lambda$    | $f$         |
|-------------------|-------|-------------------------------------------------------------------|-----------------------|-------------|--------------|-------------|
| DTP/POM           | S3    | H $\rightarrow$ L+5<br>H $\rightarrow$ L+2                        | 34<br>29              | 2.86        | 433          | 0.6         |
|                   | S4    | H $\rightarrow$ L+5<br>H $\rightarrow$ L+4<br>H $\rightarrow$ L+2 | <b>52</b><br>15<br>14 | <b>2.88</b> | <b>431</b>   | <b>0.9</b>  |
| N-Acyl<br>DTP/POM | S3    | H $\rightarrow$ L+5                                               | <b>87</b>             | <b>2.68</b> | <b>421</b>   | <b>1.46</b> |
|                   | S4    | H $\rightarrow$ L+2<br>H $\rightarrow$ L+4                        | 20<br>20              | 3.07        | 403          | 0.016       |
| PBTz/POM          | S3    | H $\rightarrow$ L+5                                               | <b>88</b>             | <b>2.92</b> | <b>424</b>   | <b>1.37</b> |
|                   | S4    | H $\rightarrow$ L+9                                               | 40                    | 3.18        | 389          | 0.004       |
| NPTA/POM          | S2    | H $\rightarrow$ L                                                 | 70                    | 2.4         | 518          | 0.01        |
|                   | S3    | H $\rightarrow$ L+5                                               | <b>85</b>             | <b>2.67</b> | <b>462</b>   | <b>1.99</b> |
|                   | S4    | H $\rightarrow$ L+4<br>H $\rightarrow$ L+2                        | 42<br>42              | 2.8         | 442          | 0.007       |
| DBTP/POM          | S3    | H $\rightarrow$ L+4<br>H $\rightarrow$ L+5                        | <b>34</b><br>28       | <b>3.16</b> | <b>425</b>   | <b>0.78</b> |
|                   | S4    | H $\rightarrow$ L+5<br>H $\rightarrow$ L+4                        | 44<br>23              | 3.19        | 390          | 1.28        |
| SN5/POM           | S3    | H $\rightarrow$ L+5<br>H $\rightarrow$ L+4                        | <b>72</b><br>9        | <b>2.55</b> | <b>480</b>   | <b>1.78</b> |
|                   | S4    | H $\rightarrow$ L+4<br>H $\rightarrow$ L+2                        | 37<br>35              | 2.6         | 477          | 0.31        |
| SN6/POM           | S3    | H $\rightarrow$ L+5                                               | <b>81</b>             | <b>2.55</b> | <b>486</b>   | <b>2.31</b> |
|                   | S4    | H $\rightarrow$ L+4<br>H $\rightarrow$ L+2                        | 42<br>40              | 2.62        | 473          | 0.02        |
| DTPO/POM          | S3    | H $\rightarrow$ L+5                                               | <b>84.5</b>           | <b>2.89</b> | <b>428</b>   | <b>1.53</b> |
|                   | S4    | H $\rightarrow$ L+4                                               | 24.5                  | 3.1         | 388          | 0.003       |
| BDTP/POM          | S2    | H $\rightarrow$ L+5                                               | <b>77</b>             | <b>2.61</b> | <b>474</b>   | <b>2.07</b> |
|                   | S3    | H $\rightarrow$ L<br>H $\rightarrow$ L+1                          | 44<br>35              | 2.67        | 463          | 0.029       |
| TD/POM            | S2    | H $\rightarrow$ L+5                                               | <b>74</b>             | <b>2.67</b> | <b>464.5</b> | <b>1.82</b> |
|                   | S3    | H $\rightarrow$ L<br>H $\rightarrow$ L+1                          | <b>50</b><br>27       | <b>2.7</b>  | <b>460</b>   | <b>0.2</b>  |
| BTI/POM           | S2    | H $\rightarrow$ L+5                                               | <b>92</b>             | <b>2.83</b> | <b>438</b>   | <b>1.00</b> |
|                   | S3    | H $\rightarrow$ L                                                 | 79                    | 3.1         | 399          | 0.00        |
| TBI/POM           | S1    | H $\rightarrow$ L+5                                               | <b>80</b>             | <b>2.61</b> | <b>474</b>   | <b>1.88</b> |
|                   | S2    | H $\rightarrow$ L+1<br>H $\rightarrow$ L+4                        | 37<br>12              | 2.63        | 470          | 0.07        |

| <b>Dye</b> \ <b>NTO</b> | <b>Hole</b>                                                                         | <b>Elec</b>                                                                          |
|-------------------------|-------------------------------------------------------------------------------------|--------------------------------------------------------------------------------------|
| <b>DTP/POM</b>          | 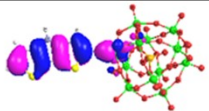   |    |
| <b>N-Acyl DTP/POM</b>   |    |    |
| <b>PBTz/POM</b>         |    |    |
| <b>NPTA/POM</b>         |    |    |
| <b>DBTP/POM</b>         |    |    |
| <b>SN5/POM</b>          |    |    |
| <b>SN6/POM</b>          |   |   |
| <b>DTPO/POM</b>         |  |  |
| <b>BDTP/POM</b>         |  |  |
| <b>TD/POM</b>           |  |  |
| <b>BTI/POM</b>          |  |  |
| <b>TBI/POM</b>          |  |  |

**Figure S3.** NTO<sub>s</sub> of the studied designed hybrids

**Table S3.** CDD,  $C_{\text{hole}}$  &  $C_{\text{ele}}$  map,  $\Delta r$ ,  $S_r$  and  $t$  index of the studied designed hybrids  
(Green and blue show hole and electron respectively)

| Dye            | CDD                                                                                 | $C_{\text{hole}}$ & $C_{\text{ele}}$ map                                             | $\Delta r$ (Å) | $S_r$ |
|----------------|-------------------------------------------------------------------------------------|--------------------------------------------------------------------------------------|----------------|-------|
| N-Acyl DTP/POM | 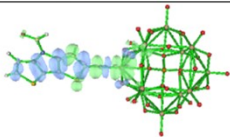   |    | 3.45           | 0.78  |
| PBTz/POM       |    |    | 3.76           | 0.77  |
| NPTA/POM       |    |    | 5.19           | 0.76  |
| SN5/POM(S3)    |    |    | 6.02           | 0.70  |
| DTPO/POM       |  |  | 3.81           | 0.77  |
| TD/POM(S2)     |  |  | 6.09           | 0.77  |
| BTI/POM        |  |  | 1.09           | 0.79  |
| TBI/POM        |  |  | 3.20           | 0.81  |

CDD = charge density difference

$C_{\text{hole}}$  &  $C_{\text{ele}}$  map = graph of the distance between the center of the hole and the electron

$D$  index = Hole–electron distance

$S_r$  = overlap between the hole and the electron

$t$  index = separation degree of hole and electron in CT direction.

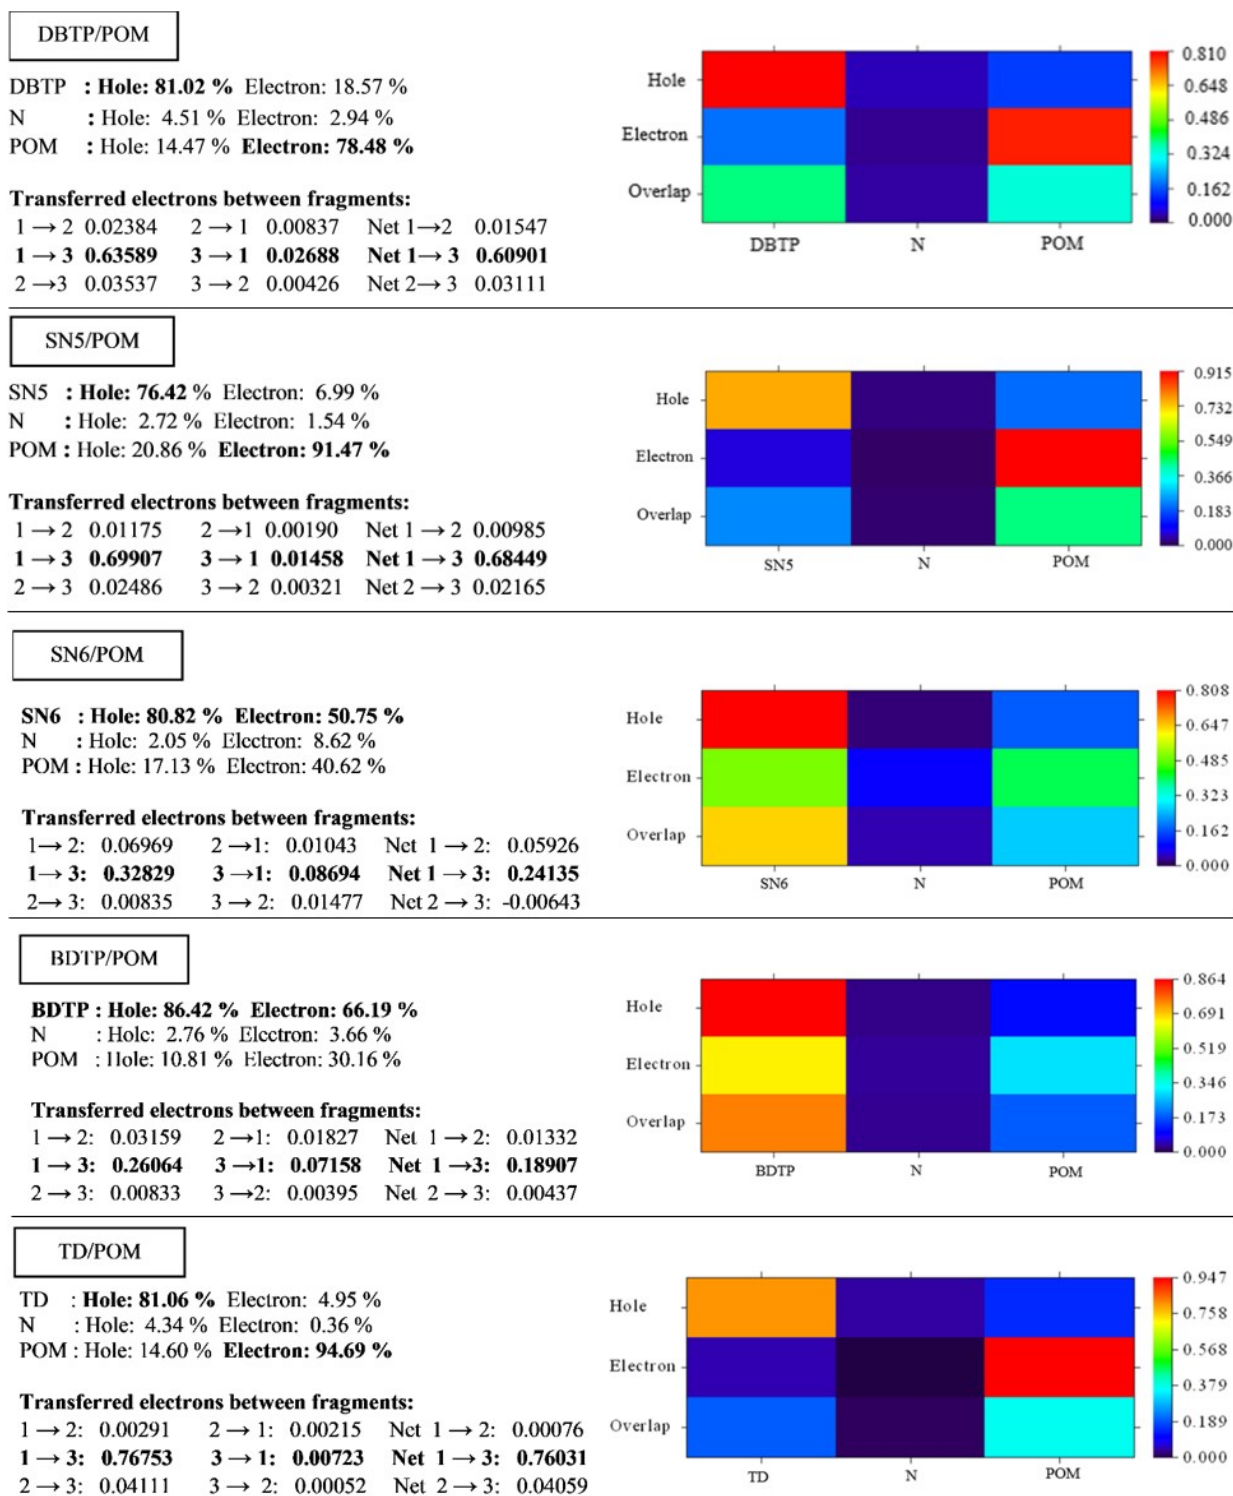

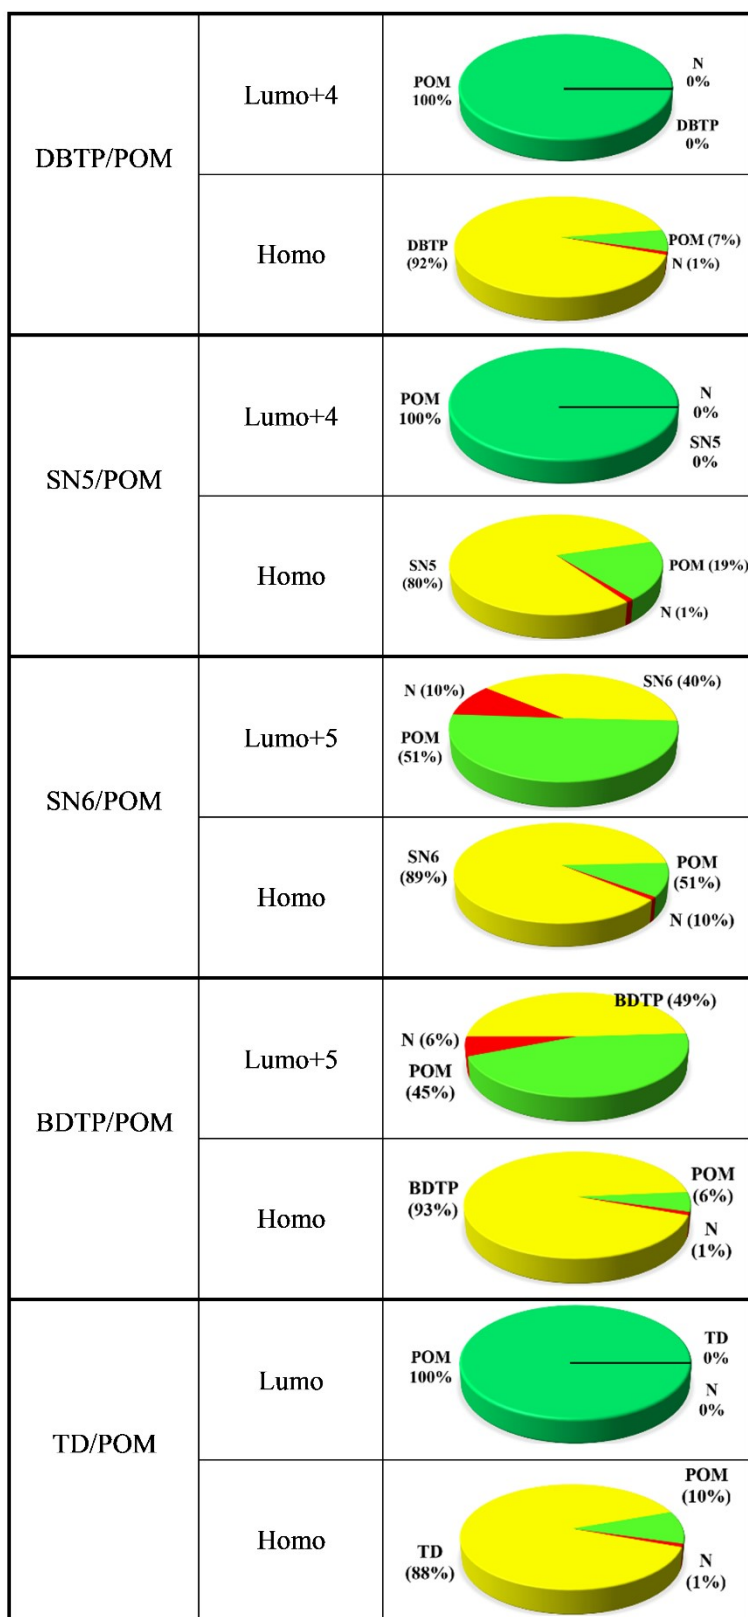

**Figure S5.** The percentage of each fragment to the molecular orbitals of the studied designed hybrids

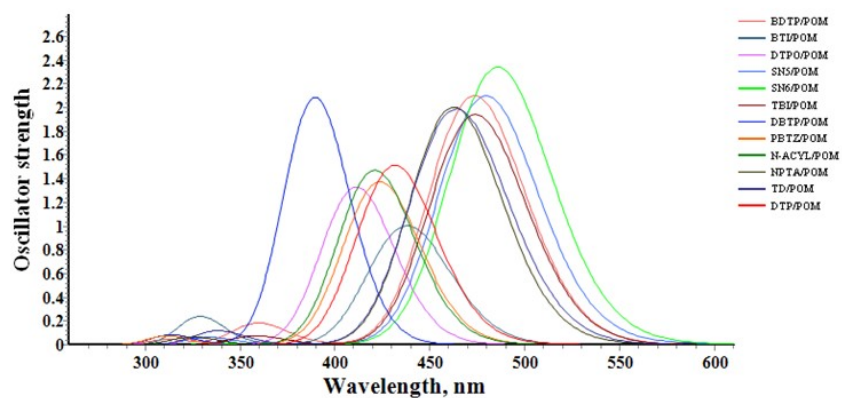

**Figure S6.** Simulated absorption spectra of the studied designed hybrids

## References:

- (1) Le Bahers, T.; Adamo, C.; Ciofini, I. A qualitative index of spatial extent in charge-transfer excitations. *J. Chem. Theory Comput.* **2011**, 7 (8), 2498–2506.
- (2) Grätzel, M. Recent advances in sensitized mesoscopic solar cells. *Acc. Chem. Res.* **2009**, 42 (11), 1788–1798.
- (3) Marinado, T.; Hagberg, D. P.; Hedlund, M.; Edvinsson, T.; Johansson, E. M.; Boschloo, G.; Rensmo, H.; Brinck, T.; Sun, L.; Hagfeldt, A. Rhodanine dyes for dye-sensitized solar cells: spectroscopy, energy levels and photovoltaic performance. *Phys. Chem. Chem. Phys.* **2009**, 11 (1), 133–141, 10.1039/B812154K.
- (4) Yan, L.; Jin, M.; Song, P.; Su, Z. Electronic properties of unprecedented bridging organoimido-substituted hexamolybdate: new insights from density functional theory study. *J. Phys. Chem. B* **2010**, 114 (11), 3754–3758.
- (5) Zhang, J.; Li, H. -B.; Geng, Y.; Wen, S. -Z.; Zhong, R.-L.; Wu, Y.; Fu, Q.; Su, Z. -M. Modification on C219 by coumarin donor toward efficient sensitizer for dye sensitized solar cells: a theoretical study. *Dyes and Pigm.* **2013**, 99 (1), 127–135.
- (6) Koopmans, T. Ordering of wave functions and eigenenergies to the individual electrons of an atom. *Physica* **1933**, 1, 104–113.
- (7) Feng, J.; Jiao, Y.; Ma, W.; Nazeeruddin, M. K.; Grätzel, M.; Meng, S. First principles design of dye molecules with ullazine donor for dye sensitized solar cells. *J. Phys. Chem. C* **2013**, 117 (8), 3772–3778.
- (8) Katoh, R.; Furube, A.; Yoshihara, T.; Hara, K.; Fujihashi, G.; Takano, S.; Murata, S.; Arakawa, H.; Tachiya, M. Efficiencies of electron injection from excited N3 dye into nanocrystalline semiconductor (ZrO<sub>2</sub>, TiO<sub>2</sub>, ZnO, Nb<sub>2</sub>O<sub>5</sub>, SnO<sub>2</sub>, In<sub>2</sub>O<sub>3</sub>) films. *J. Phys. Chem. B* **2004**, 108 (15), 4818–4822.
- (9) Daeneke, T.; Mozer, A. J.; Uemura, Y.; Makuta, S.; Fekete, M.; Tachibana, Y.; Koumura, N.; Bach, U.; Spiccia, L. Dye regeneration kinetics in dye-sensitized solar cells. *J. Am. Chem. Soc.* **2012**, 134 (41), 16925–16928.
- (10) Maestre, J. M.; Lopez, X.; Bo, C.; Poblet, J. M.; Casan-Pastor, N. Electronic and magnetic properties of  $\alpha$ -Keggin anions: A DFT study of [XM<sub>12</sub>O<sub>40</sub>]<sup>n-</sup>, (M = W, Mo; X = Al<sup>III</sup>, Si<sup>IV</sup>, P<sup>V</sup>, Fe<sup>III</sup>, Co<sup>II</sup>, Co<sup>III</sup>) and [SiM<sub>11</sub>VO<sub>40</sub>]<sup>m-</sup> (M = Mo and W). *J. Am. Chem. Soc.* **2001**, 123, 3749–3758.
